# Supplementary material for: The RyR1 P3528S Substitution Alters Mouse Skeletal Muscle Contractile Properties and RyR1 Ion Channel Gating
Source: MDPI journal article supplement (doi:10.3390/ijms25010434), 2023-12-28
Supplement: s1 [file s1]

# The RyR1 P3528S Substitution Alters Mouse Skeletal Muscle Contractile Properties and RyR1 Ion Channel Gating

Chris G. Thekkedam <sup>1,†</sup>, Travis L. Dutka <sup>2</sup>, Chris Van der Poel <sup>3</sup>, Gaetan Burgio <sup>4</sup> and Angela F. Dulhunty <sup>1,\*</sup>

<sup>1</sup> Eccles Institute of Neuroscience, John Curtin School of Medical Research, Australian National University, Acton, ACT 2601, Australia; c.thekkedam@victorchang.edu.au

<sup>2</sup> Department of Animal, Plant and Soil Sciences, School of Agriculture, Biomedicine and Environment (SABE), La Trobe University, Melbourne, VIC 3086, Australia; t.dutka@latrobe.edu.au

<sup>3</sup> Department of Microbiology, Anatomy, Physiology and Pharmacology, School of Agriculture, Biomedicine and Environment, La Trobe University, Melbourne, VIC 3086, Australia; c.vanderpoel@latrobe.edu.au

<sup>4</sup> Division of Genome Sciences and Cancer, John Curtin School of Medical Research, Australian National University, Acton, ACT 2601, Australia; gaetan.burgio@anu.edu.au

\* Correspondence: angela.dulhunty@anu.edu.au

† Present address: Victor Chang Institute, Lowy Packer Building, 405 Liverpool St, Darlinghurst, NSW 2010, Australia.

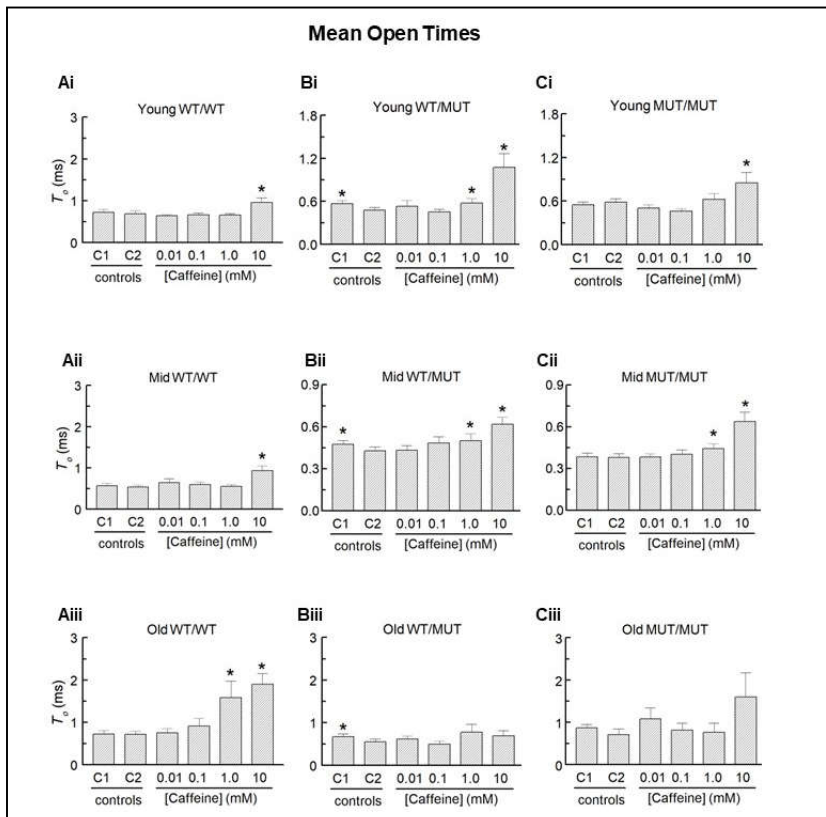

**Figure S1. The influence of the RyR1 P3528S mutation on the changes in the mean open time of RyR1 channels in response to a reduction in cytoplasmic  $[Ca^{2+}]$  from 1  $\mu M$  to 300 nM (C1 to C2) and to the addition of caffeine in increasing concentrations from 10  $\mu M$  to 10 mM. A-C. Graphs of the average channel mean open time ( $T_o$  in ms) with 1  $\mu M$  *cis*  $Ca^{2+}$  (C1), 300 nM *cis*  $Ca^{2+}$  (C2) and then after progressive increases in cytoplasmic [caffeine] to 10  $\mu M$ , 100  $\mu M$ , 1 mM and 10 mM. Average  $T_o$  is shown for channels from WT/WT mice (column A), WT/MUT mice (column B) and MUT/MUT mice (column C). Average  $T_o$  is shown for channels from young (row Ai-Ci), middle (row Aii-Cii) and old (row Aiii-Ciii) aged mice.  $T_o$  values obtained at +40 mV and -40 mV are included in the average values, shown as mean  $\pm$  sem. Young WT/WT, n=14; young WT/MUT n=16; young MUT/MUT n=12; middle aged WT/WT n=16; middle aged**

WT/MUT n=16; middle aged MUT/MUT n=14; old WT/WT n=8; old WT/MUT n=8; old MUT/MUT n=6. \*, significantly different from C2 (300 nM *cis* Ca<sup>2+</sup>).

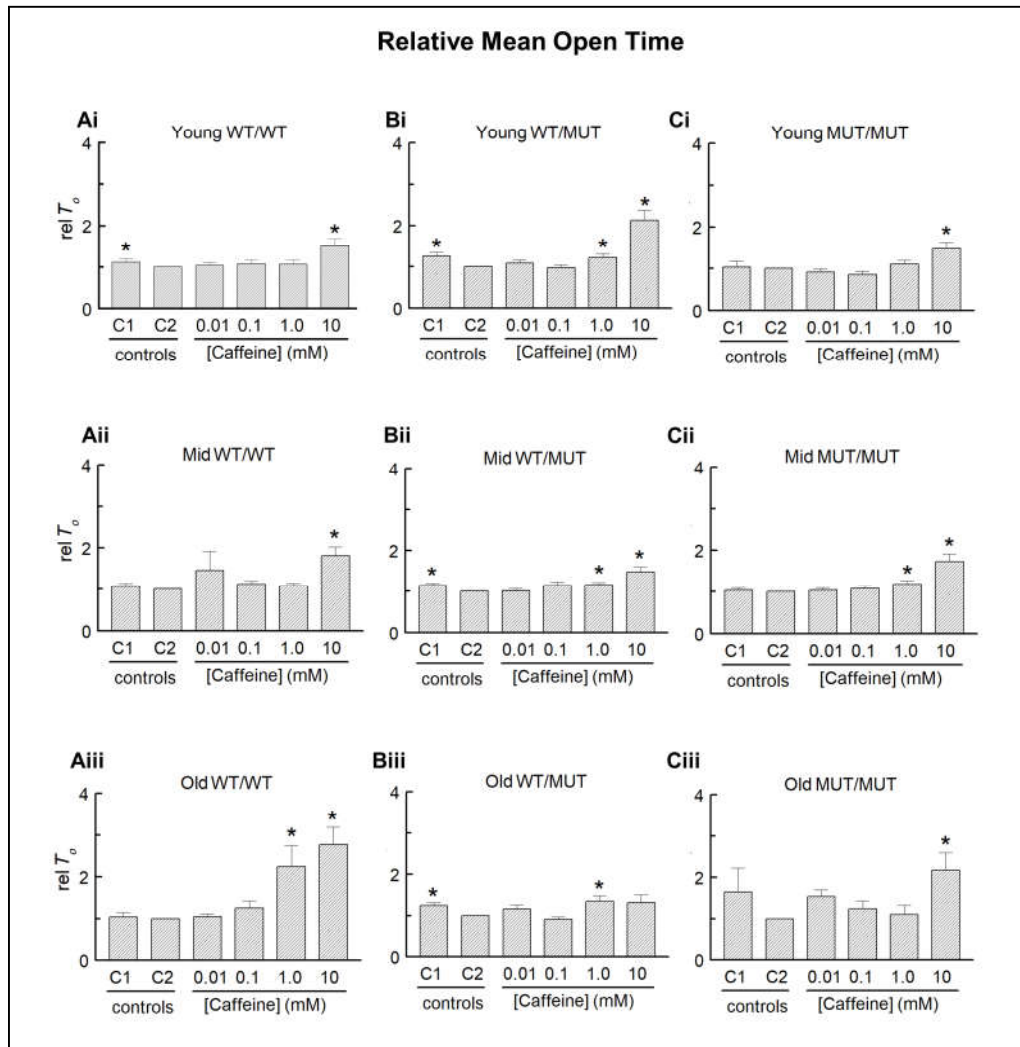

**Figure S2. The influence of the RyR1 P3528S mutation on the changes in the relative mean open time of RyR1 channels in response to a reduction in cytoplasmic [Ca<sup>2+</sup>] from 1  $\mu$ M to 300 nM (C1 to C2) and to the addition of caffeine in increasing concentrations from 10  $\mu$ M to 10 mM. A-C. Graphs of average relative mean open time (rel  $T_o$ ) with 1  $\mu$ M *cis* Ca<sup>2+</sup> (C1), 300 nM *cis* Ca<sup>2+</sup> (C2) and then after progressive increases in cytoplasmic [caffeine] to 10  $\mu$ M, 100  $\mu$ M, 1 mM and 10 mM. Average rel  $P_o$  is shown for channels from WT/WT mice (column A), WT/MUT mice (column B) and MUT/MUT mice (column C). Data is shown for channels from young (Ai - Aiii), middle (Bi - Biii) and old (Ci - Ciii) aged mice. Rel  $T_o$  values obtained at +40 mV and -40 mV are included in the average values which are shown as mean  $\pm$  sem. The numbers of observations in each group were as follows. Young WT/WT, n=14; young WT/MUT n=16; young MUT/MUT n=12; middle aged WT/WT n=16; middle aged WT/MUT n=16; middle aged MUT/MUT n=14; old WT/WT n=8; old WT/MUT n=8; old MUT/MUT n=6. \*, significantly different from C2 (300 nM *cis* Ca<sup>2+</sup>).**

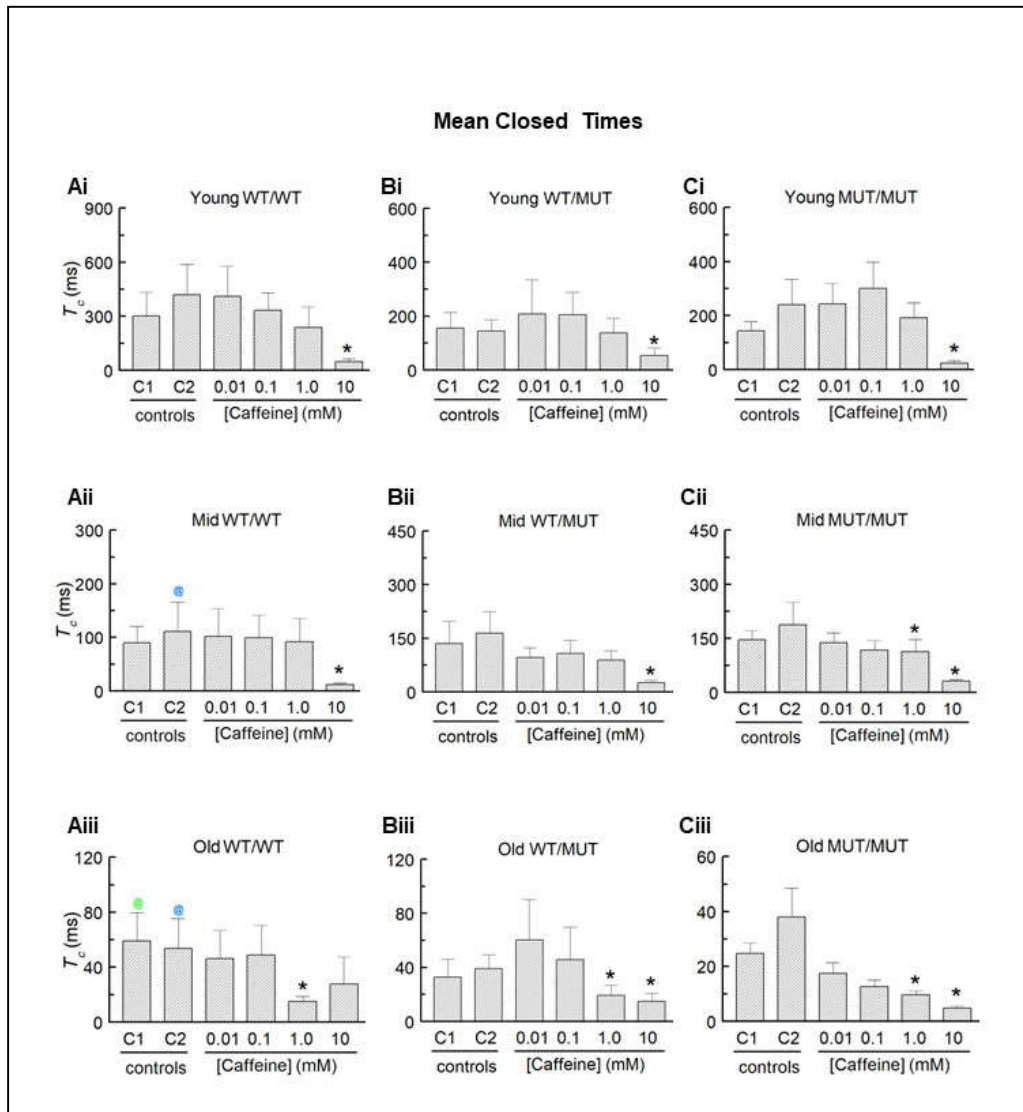

**Figure S3. The influence of the RyR1 P3528S mutation on the changes in the mean closed duration of RyR1 channels in response to a reduction in cytoplasmic  $[Ca^{2+}]$  from 1  $\mu M$  to 300 nM (C1 to C2) and to the addition of caffeine in increasing concentrations from 10  $\mu M$  to 10 mM. A-C. Graphs of average mean closed time ( $T_c$ ) with 1  $\mu M$  *cis*  $Ca^{2+}$  (C1), 300 nM *cis*  $Ca^{2+}$  (C2) and then after progressive increases in cytoplasmic [caffeine] to 10  $\mu M$ , 100  $\mu M$ , 1 mM and 10 mM. Average  $T_c$  is shown for channels from WT/WT (column A), WT/MUT (column B) and MUT/MUT (column C) mice. Data is shown for channels from young (Ai - Aiii), middle (Bi - Biii) and old (Ci - Ciii) aged mice.  $T_c$  values obtained at +40 mV and -40 mV are included in the average values which are shown as mean  $\pm$  sem. The numbers of observations in each group were as follows. Young WT/WT, n=14; young WT/MUT n=16; young MUT/MUT n=12; middle aged WT/WT n=16; middle aged WT/MUT n=16; middle aged MUT/MUT n=14; old WT/WT n=8; old WT/MUT n=8; old MUT/MUT n=6. \*, significantly different from C2 (300 nM *cis*  $Ca^{2+}$ );  $\textcircled{g}$ , significantly different from C1 (1  $\mu M$  *cis*  $Ca^{2+}$ ) in channels from young WT/WT mice;  $\textcircled{b}$ , significantly different from C2 (300 nM *cis*  $Ca^{2+}$ ) in channels from young WT/WT mice.**

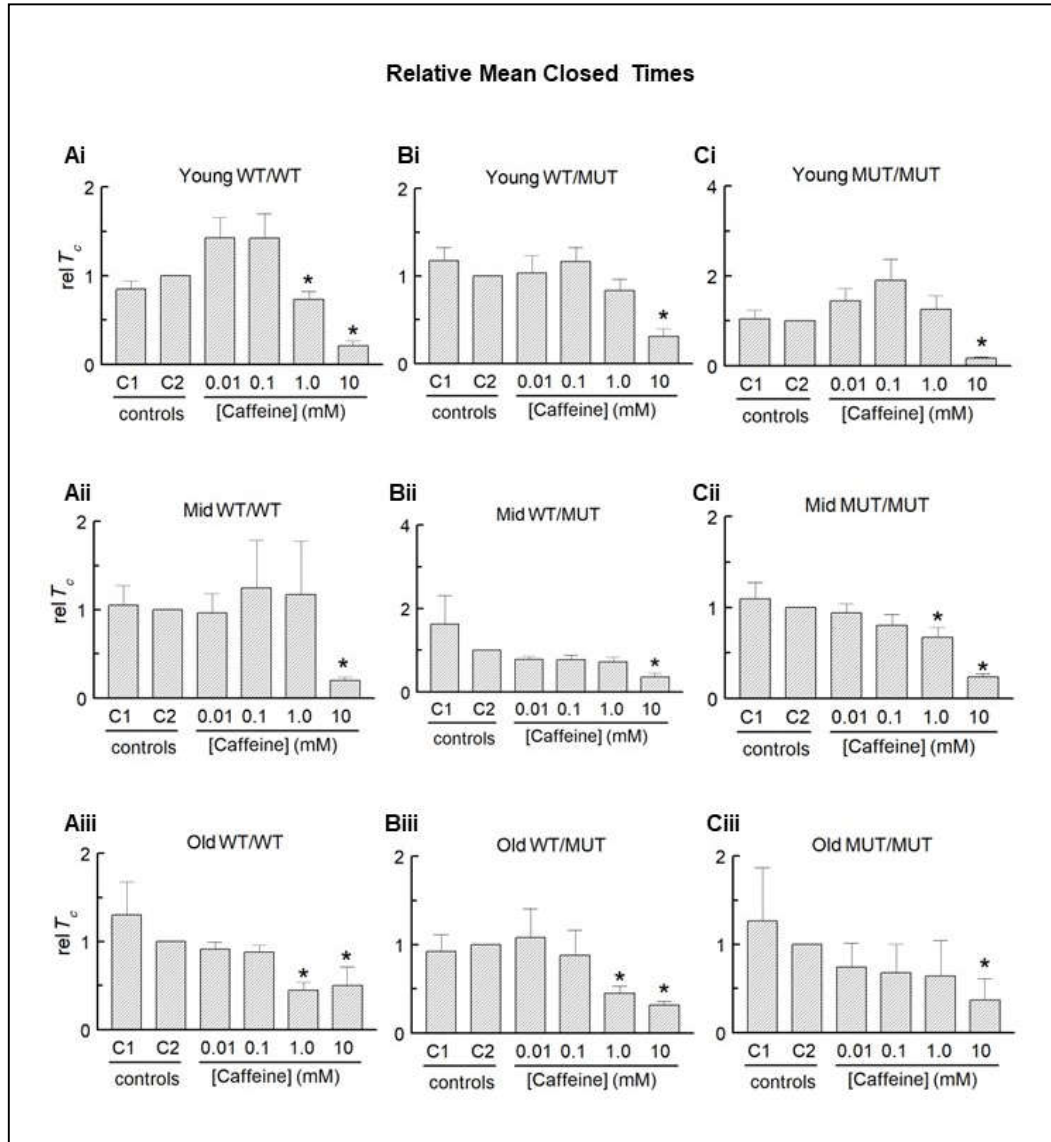

**Figure S4. The influence of the RyR1 P3528S mutation on the changes in the relative mean closed duration of RyR1 channels in response to a reduction in cytoplasmic  $[Ca^{2+}]$  from 1  $\mu M$  to 300 nM (C1 to C2) and to the addition of caffeine in increasing concentrations from 10  $\mu M$  to 10 mM. A-C. Graphs of average relative mean closed time (rel  $T_c$ ) with 1  $\mu M$  *cis*  $Ca^{2+}$  (C1), 300 nM *cis*  $Ca^{2+}$  (C2) and then after progressive increases in cytoplasmic [caffeine] to 10  $\mu M$ , 100  $\mu M$ , 1 mM and 10 mM. Average rel  $T_c$  is shown for channels from WT/WT mice (column A), WT/MUT mice (column B) and MUT/MUT mice (column C). Data is shown for channels from young (Ai - Aiii), middle (Bi - Biii) and old (row Ci - Ciii) aged mice. Rel  $T_c$  values obtained at +40 mV and -40 mV are included in the average values which are shown as mean  $\pm$  sem. The numbers of observations in each group were as follows. Young WT/WT, n=14; young WT/MUT n=16; young MUT/MUT n=12; middle aged WT/WT n=16; middle aged WT/MUT n=16; middle aged MUT/MUT n=14; old WT/WT n=8; old WT/MUT n=8; old MUT/MUT n=6. The asterisks indicate significant differences from the C2 control values obtained with 300 nM *cis*  $Ca^{2+}$ . \*, significantly different from C2 (300 nM *cis*  $Ca^{2+}$ ).**

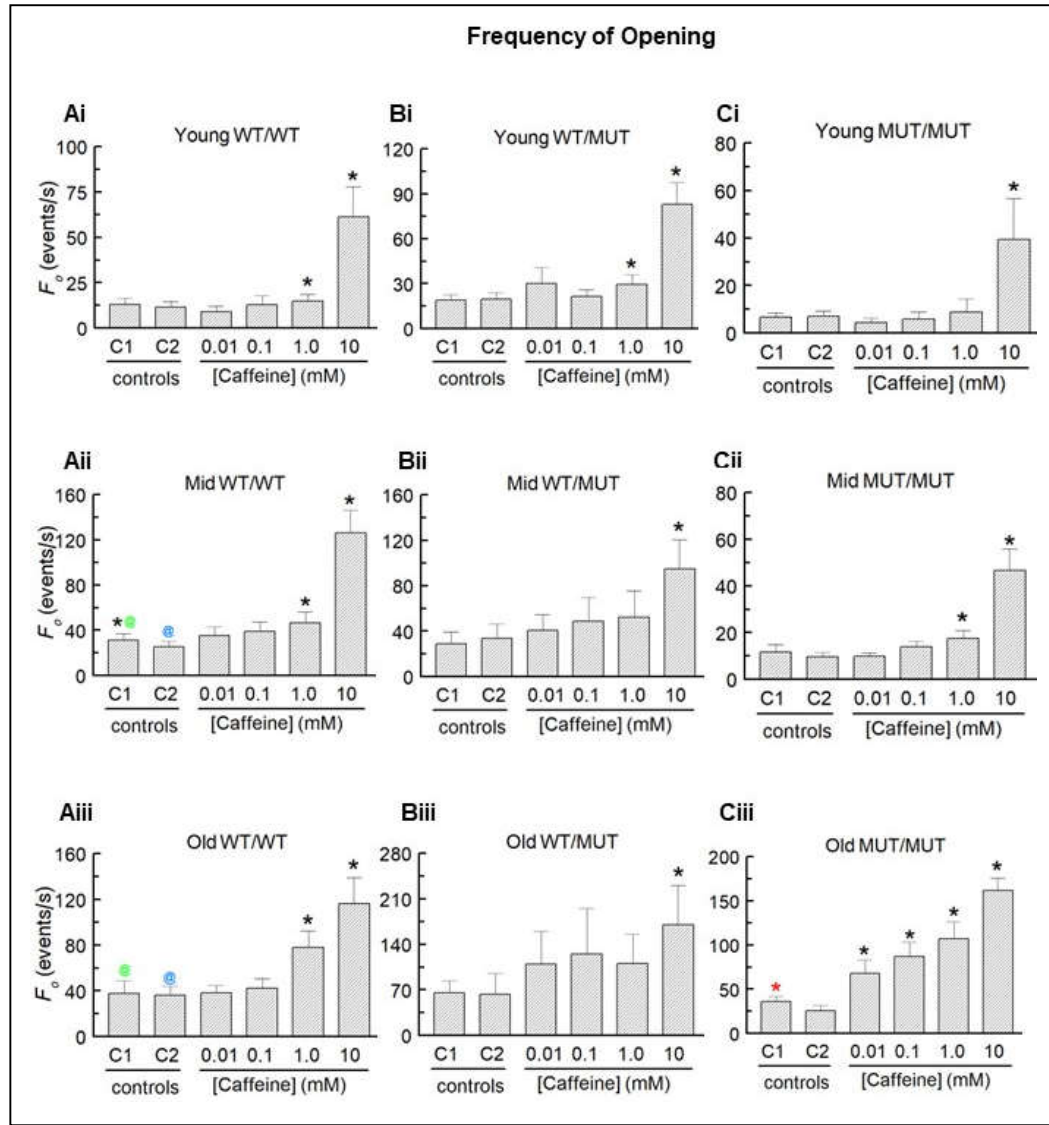

**Figure S5. The influence of the RyR1 P3528S mutation on the changes in the frequency of open events in RyR1 channels in response to a reduction in cytoplasmic  $[Ca^{2+}]$  from 1  $\mu M$  to 300 nM (C1 to C2) and response to the addition of caffeine in increasing concentrations from 10  $\mu M$  to 10 mM. A-C. Graphs of average frequency ( $F_o$ ) of channel open events with 1  $\mu M$  *cis*  $Ca^{2+}$  (C1), 300 nM *cis*  $Ca^{2+}$  (C2) and then after progressive increases in cytoplasmic caffeine concentrations to 10  $\mu M$ , 100  $\mu M$ , 1 mM and 10 mM. Average  $F_o$  is shown for channels from WT/WT mice (column A), WT/MUT mice (column B) and MUT/MUT mice (column C). Data is shown for channels from young (Ai - Aiii), middle (Bi - Biii) and old (Ci - Ciii) aged mice.  $F_o$  values obtained at +40 mV and -40 mV were included in the average values which are shown as mean  $\pm$  sem. The numbers of observations in each group were as follows. Young WT/WT, n=14; young WT/MUT n=16; young MUT/MUT n=12; middle aged WT/WT n=16; middle aged WT/MUT n=16; middle aged MUT/MUT n=14; old WT/WT n=8; old WT/MUT n=8; old MUT/MUT n=6. \* or \*, significantly different from corresponding C2 value (300 nM *cis*  $Ca^{2+}$ ); @, significantly different from C1 (1  $\mu M$  *cis*  $Ca^{2+}$ ) in channels from young WT/WT mice; @, significantly different from C2 (300 nM *cis*  $Ca^{2+}$ ) in channels from young WT/WT mice.**



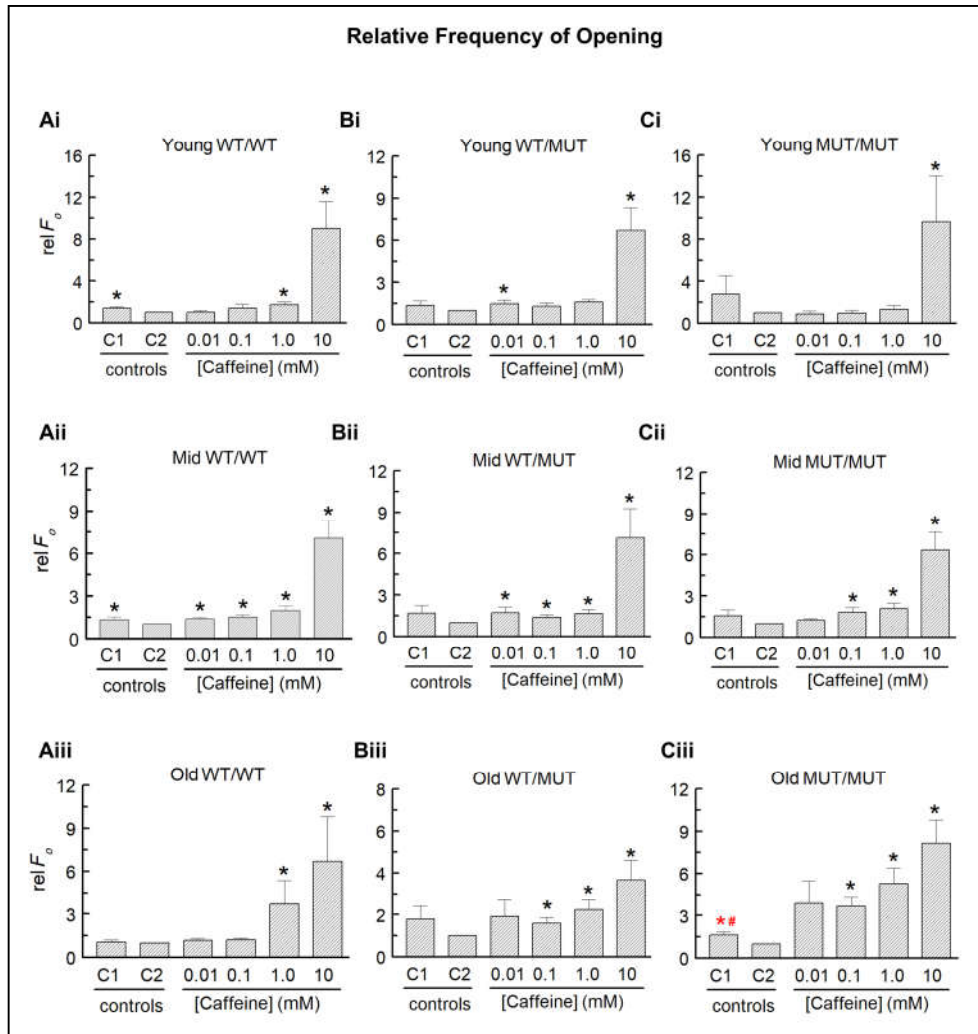

**Figure S6. The influence of the RyR1 P3528S mutation on changes in the relative frequency of open events in RyR1 channels in response to a reduction in cytoplasmic  $[Ca^{2+}]$  from 1  $\mu M$  to 300 nM (C1 to C2) and response to the addition of caffeine in increasing concentrations from 10  $\mu M$  to 10 mM. A-C. Graphs of average relative event frequency ( $rel F_o$ ) with 1  $\mu M$  *cis*  $Ca^{2+}$  (C1), 300 nM *cis*  $Ca^{2+}$  (C2) and then after progressive increases in cytoplasmic caffeine concentrations to 10  $\mu M$ , 100  $\mu M$ , 1 mM and 10 mM. Average  $rel F_o$  is shown for channels from WT/WT mice (column A), WT/MUT mice (column B) and MUT/MUT mice (column C). Data is shown for channels from young (Ai - Aiii), middle (Bi - Biii) and old (Ci - Ciii) aged mice.  $rel F_o$  values obtained at +40 mV and -40 mV were included in the average values which are shown as mean  $\pm$  sem. The numbers of observations in each group were as follows. Young WT/WT, n=14; young WT/MUT n=16; young MUT/MUT n=12; middle aged WT/WT n=16; middle aged WT/MUT n=16; middle aged MUT/MUT n=14; old WT/WT n=8; old WT/MUT n=8; old MUT/MUT n=6. \* or \*, significantly different from C2 (300 nM *cis*  $Ca^{2+}$ ); # significantly different from old WT/WT.**
